# Supplementary material for: An aptasensor based on cobalt oxyhydroxide nanosheets for the detection of thrombin
Source: Royal Society of Chemistry journal article supplement (doi:10.1039/c6ay01992g), 2016-01-01
Supplement: c6ay01992g1.pdf [file c6ay01992g1.pdf]

## Supporting Information

# **An aptasensor based on cobalt oxyhydroxide nanosheets for the detection of thrombin**

Yuan Yang, Yao Cen, Wen-Jing Deng, Ru-Qin Yu, Ting-Ting Chen\* and Xia Chu\*

State Key Laboratory of Chemo/Bio-Sensing and Chemometrics, College of Chemistry and Chemical Engineering, Hunan University, Changsha 410082, P. R. China

\*Corresponding author. Tel.: 86-731-88821916; Fax: 86-731-88821916; E-mail: [xiachu@hnu.edu.cn](mailto:xiachu@hnu.edu.cn); [chenting1104@hnu.edu.cn](mailto:chenting1104@hnu.edu.cn).

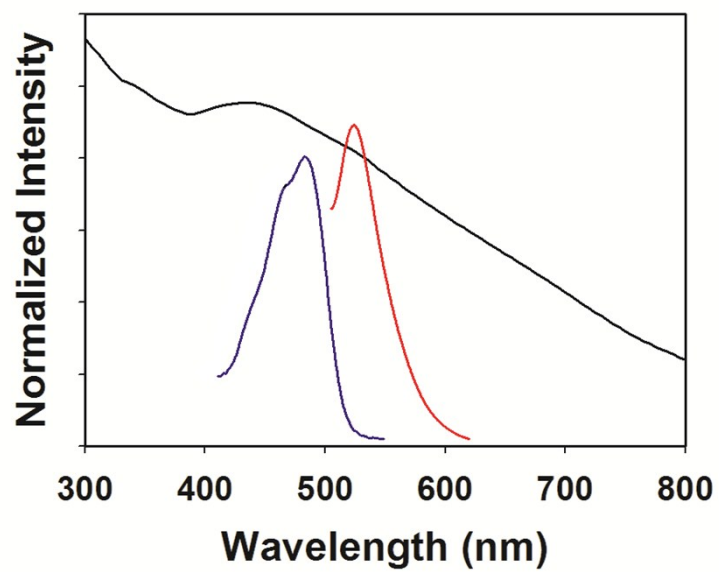

**Fig. S1.** Absorbance spectrum (blue line) and emission spectrum (red line) of FAM labeled aptamer and the absorption spectrum of the aqueous solution of CoOOH nanosheets (black line).

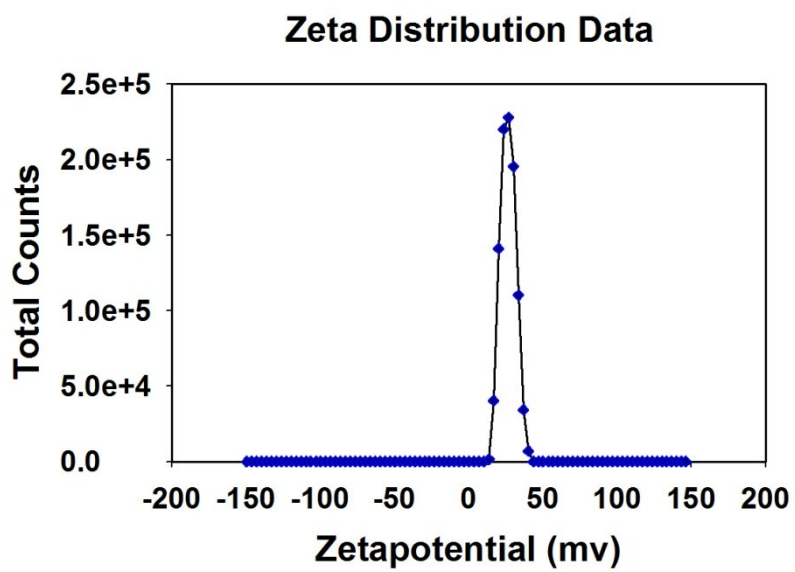

**Fig. S2.** Values of the  $\zeta$  potential for CoOOH nanosheets.

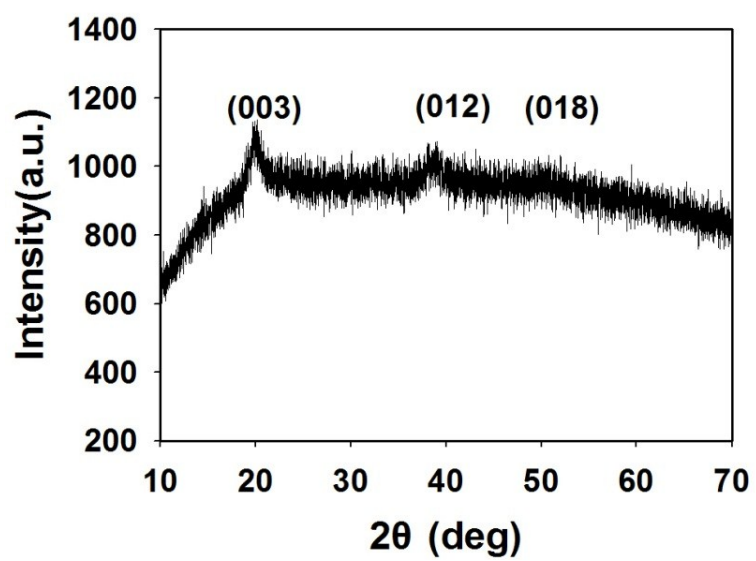

**Fig. S3.** The X-ray diffraction (XRD) pattern of CoOOH nanosheets.

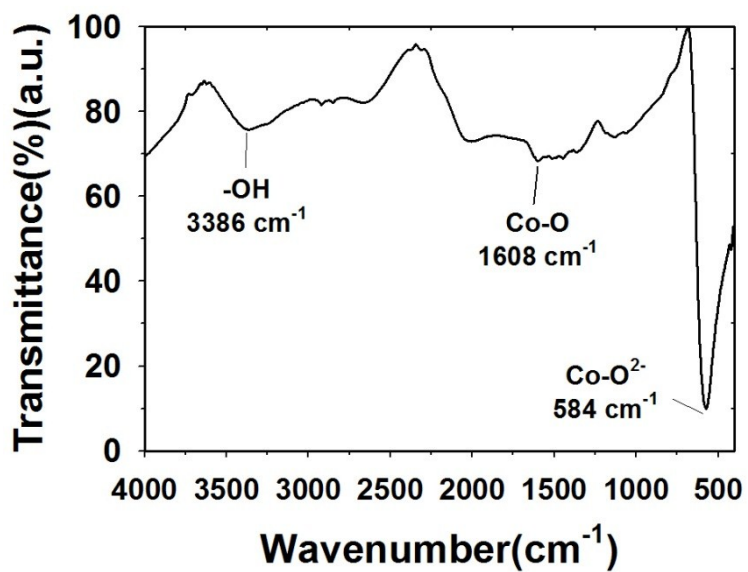

**Fig. S4.** Fourier transform infrared (FT-IR) spectrum of CoOOH nanosheets.
